# Supplementary material for: Characteristics and Outcomes for Recipients of NVX-CoV2373: A Real-World Retrospective Study in Germany
Source: MDPI journal article supplement (doi:10.3390/vaccines12040387), 2024-04-06
Supplement: s1 [file s1]

## SUPPLEMENT

**Table S1.** Underlying STIKO conditions in recipients at increased risk of severe COVID-19.

| STIKO high-risk comorbidities                                          | ICD codes                                | Measurement period                 |
|------------------------------------------------------------------------|------------------------------------------|------------------------------------|
| Congenital/acquired immunodeficiency or immunosuppression <sup>a</sup> | Z94, D84                                 | 3 years prior and including index  |
| Autoimmune diseases (including rheumatological diseases)               | M32 - M35, M30.3, M94.1                  | 3 years prior and including index  |
| Chronic cardiovascular disease                                         | I50, I48, I20-I25                        | 3 years prior and including index  |
| Chronic respiratory disease                                            | J84, J42-J46                             | 3 years prior and including index  |
| Chronic liver disease (including cirrhosis)                            | K70-K75                                  | 3 years prior and including index  |
| Chronic kidney disease                                                 | N18, N19                                 | 3 years prior and including index  |
| Chronic intestinal disease                                             | K50-K52                                  | 3 years prior and including index  |
| Chronic neurological disease <sup>a</sup>                              | G11-G13, G21-G25, G31, G36-G37, G40, G41 | 3 years prior and including index  |
| Dementia or intellectual disability                                    | F01, F03, G30, F70 – F73, F78 - F79      | 3 years prior and including index  |
| Diabetes                                                               | E10-E13                                  | 3 years prior and including index  |
| Psychiatric disorder                                                   | F43, F40 – F41, F32 – F33                | 1 year prior and including index   |
| Metabolic disease (including obesity and diabetes mellitus)            | E10 - E14, E66                           | 3 years prior and including index  |
| Down syndrome                                                          | Q90                                      | Any time prior and including index |
| Cancers                                                                | C00 – C96, D00 – D49                     | 3 years prior and including index  |

COVID-19, Coronavirus disease 2019; ICD, International Classification of Diseases; STIKO, Standing Committee on Vaccination.

<sup>a</sup>Includes chronic neuromuscular diseases.
